# Supplementary material
Source: PubMed Central journal article supplement (PMC4648786)

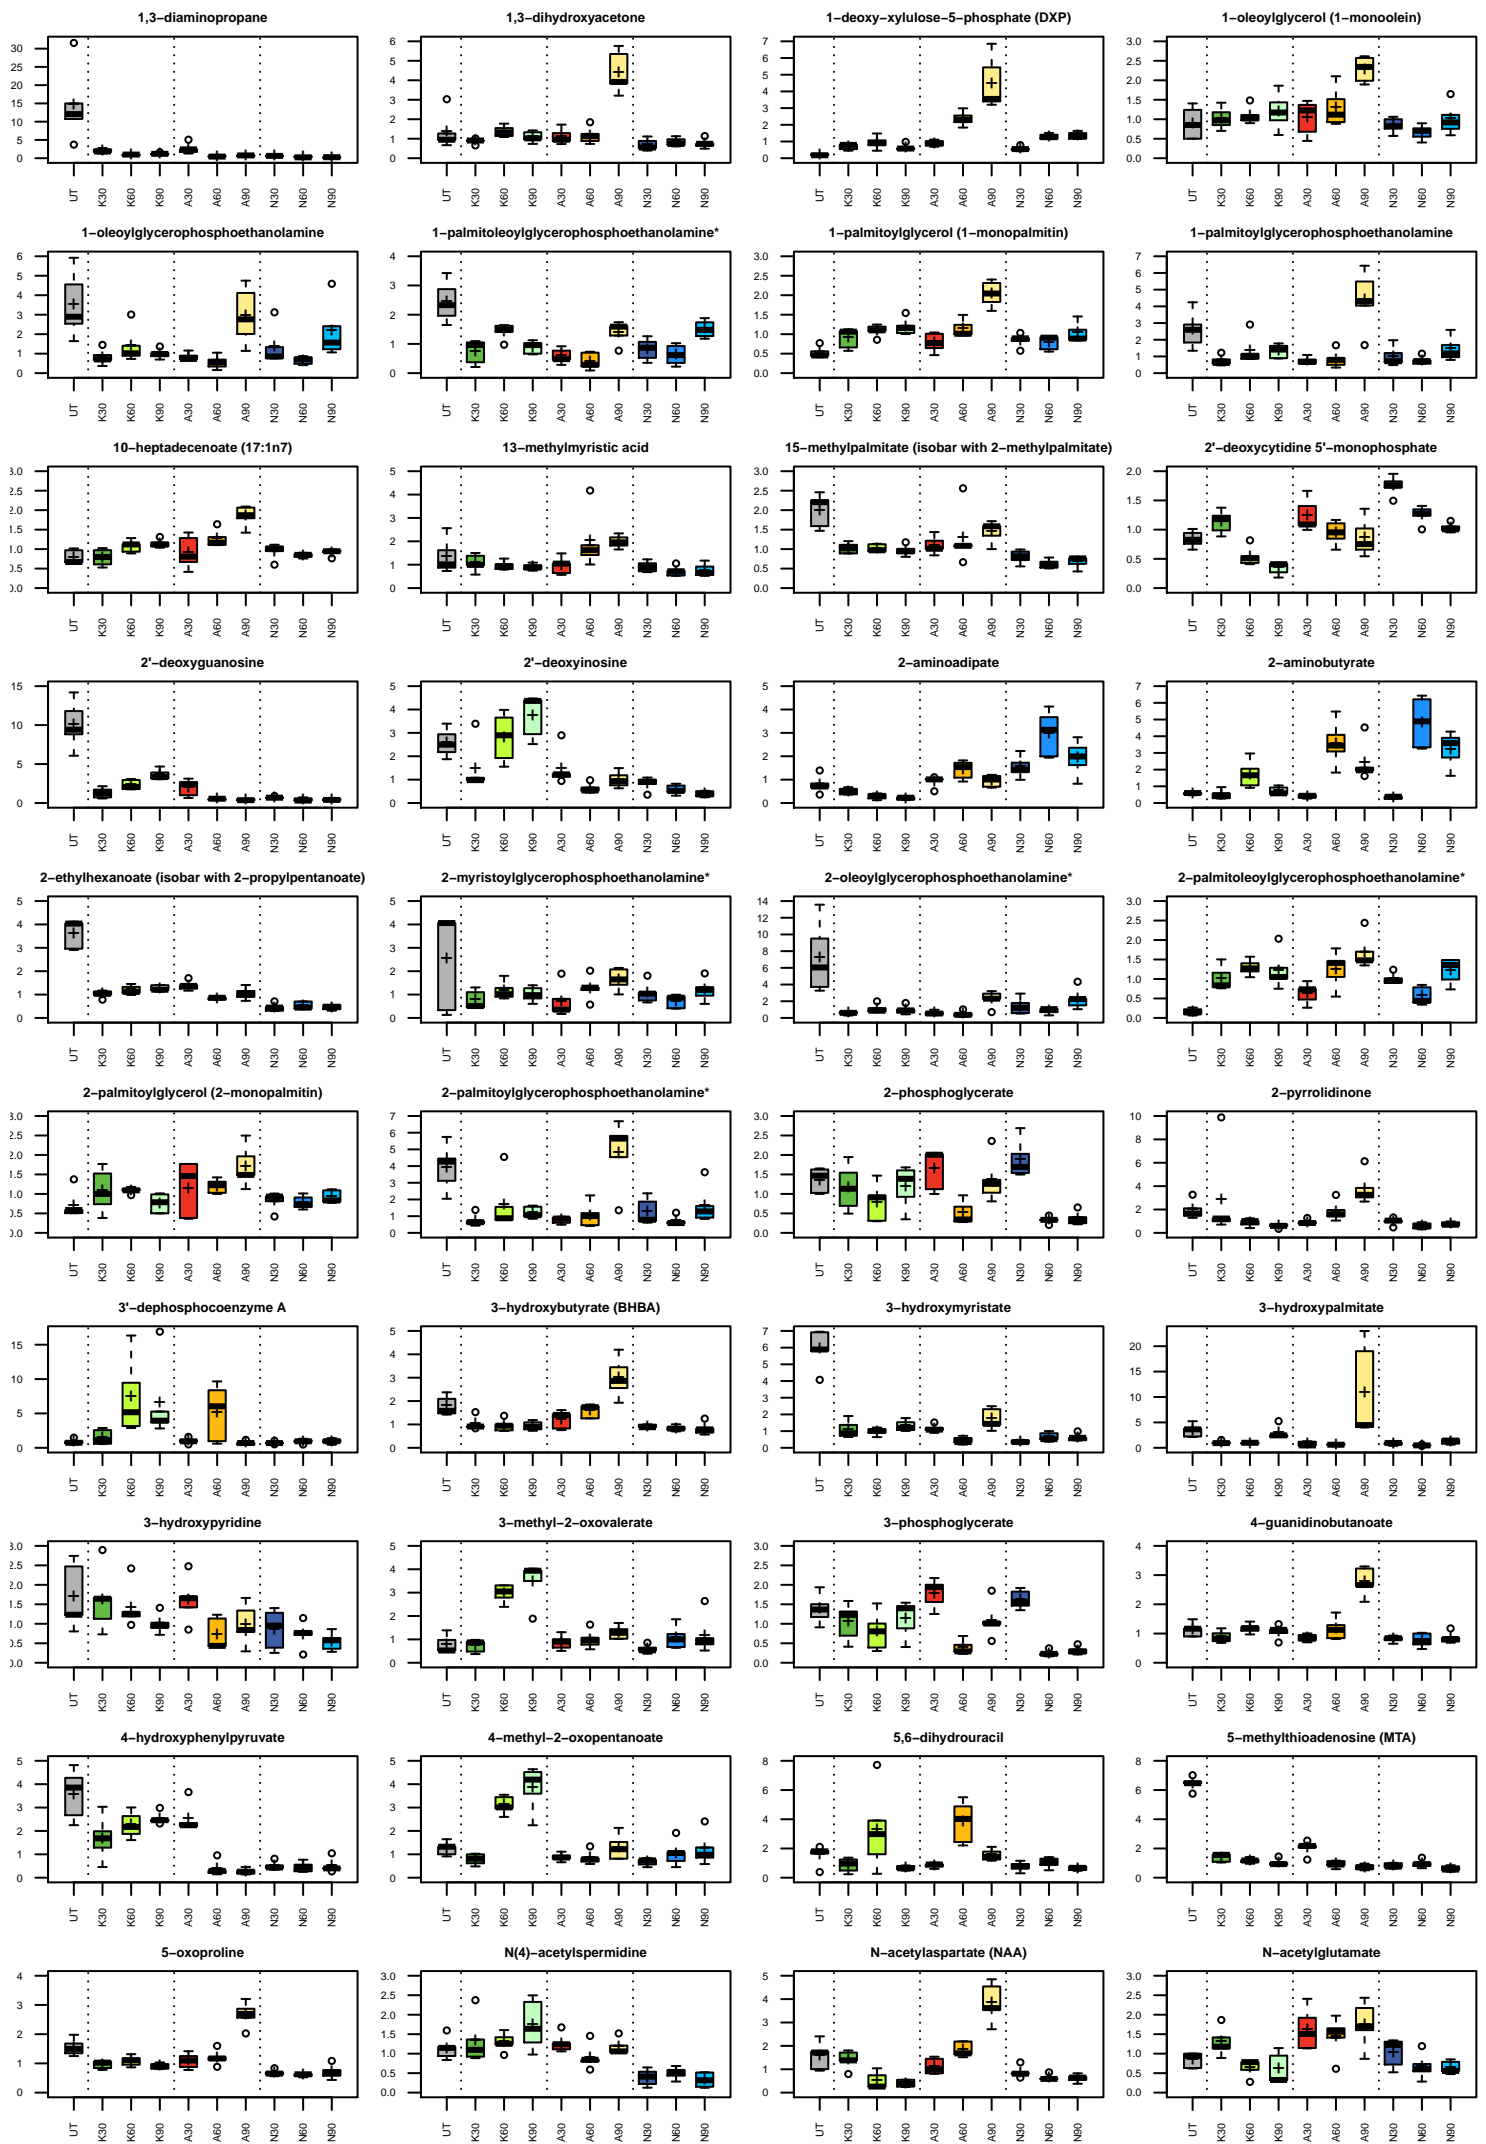

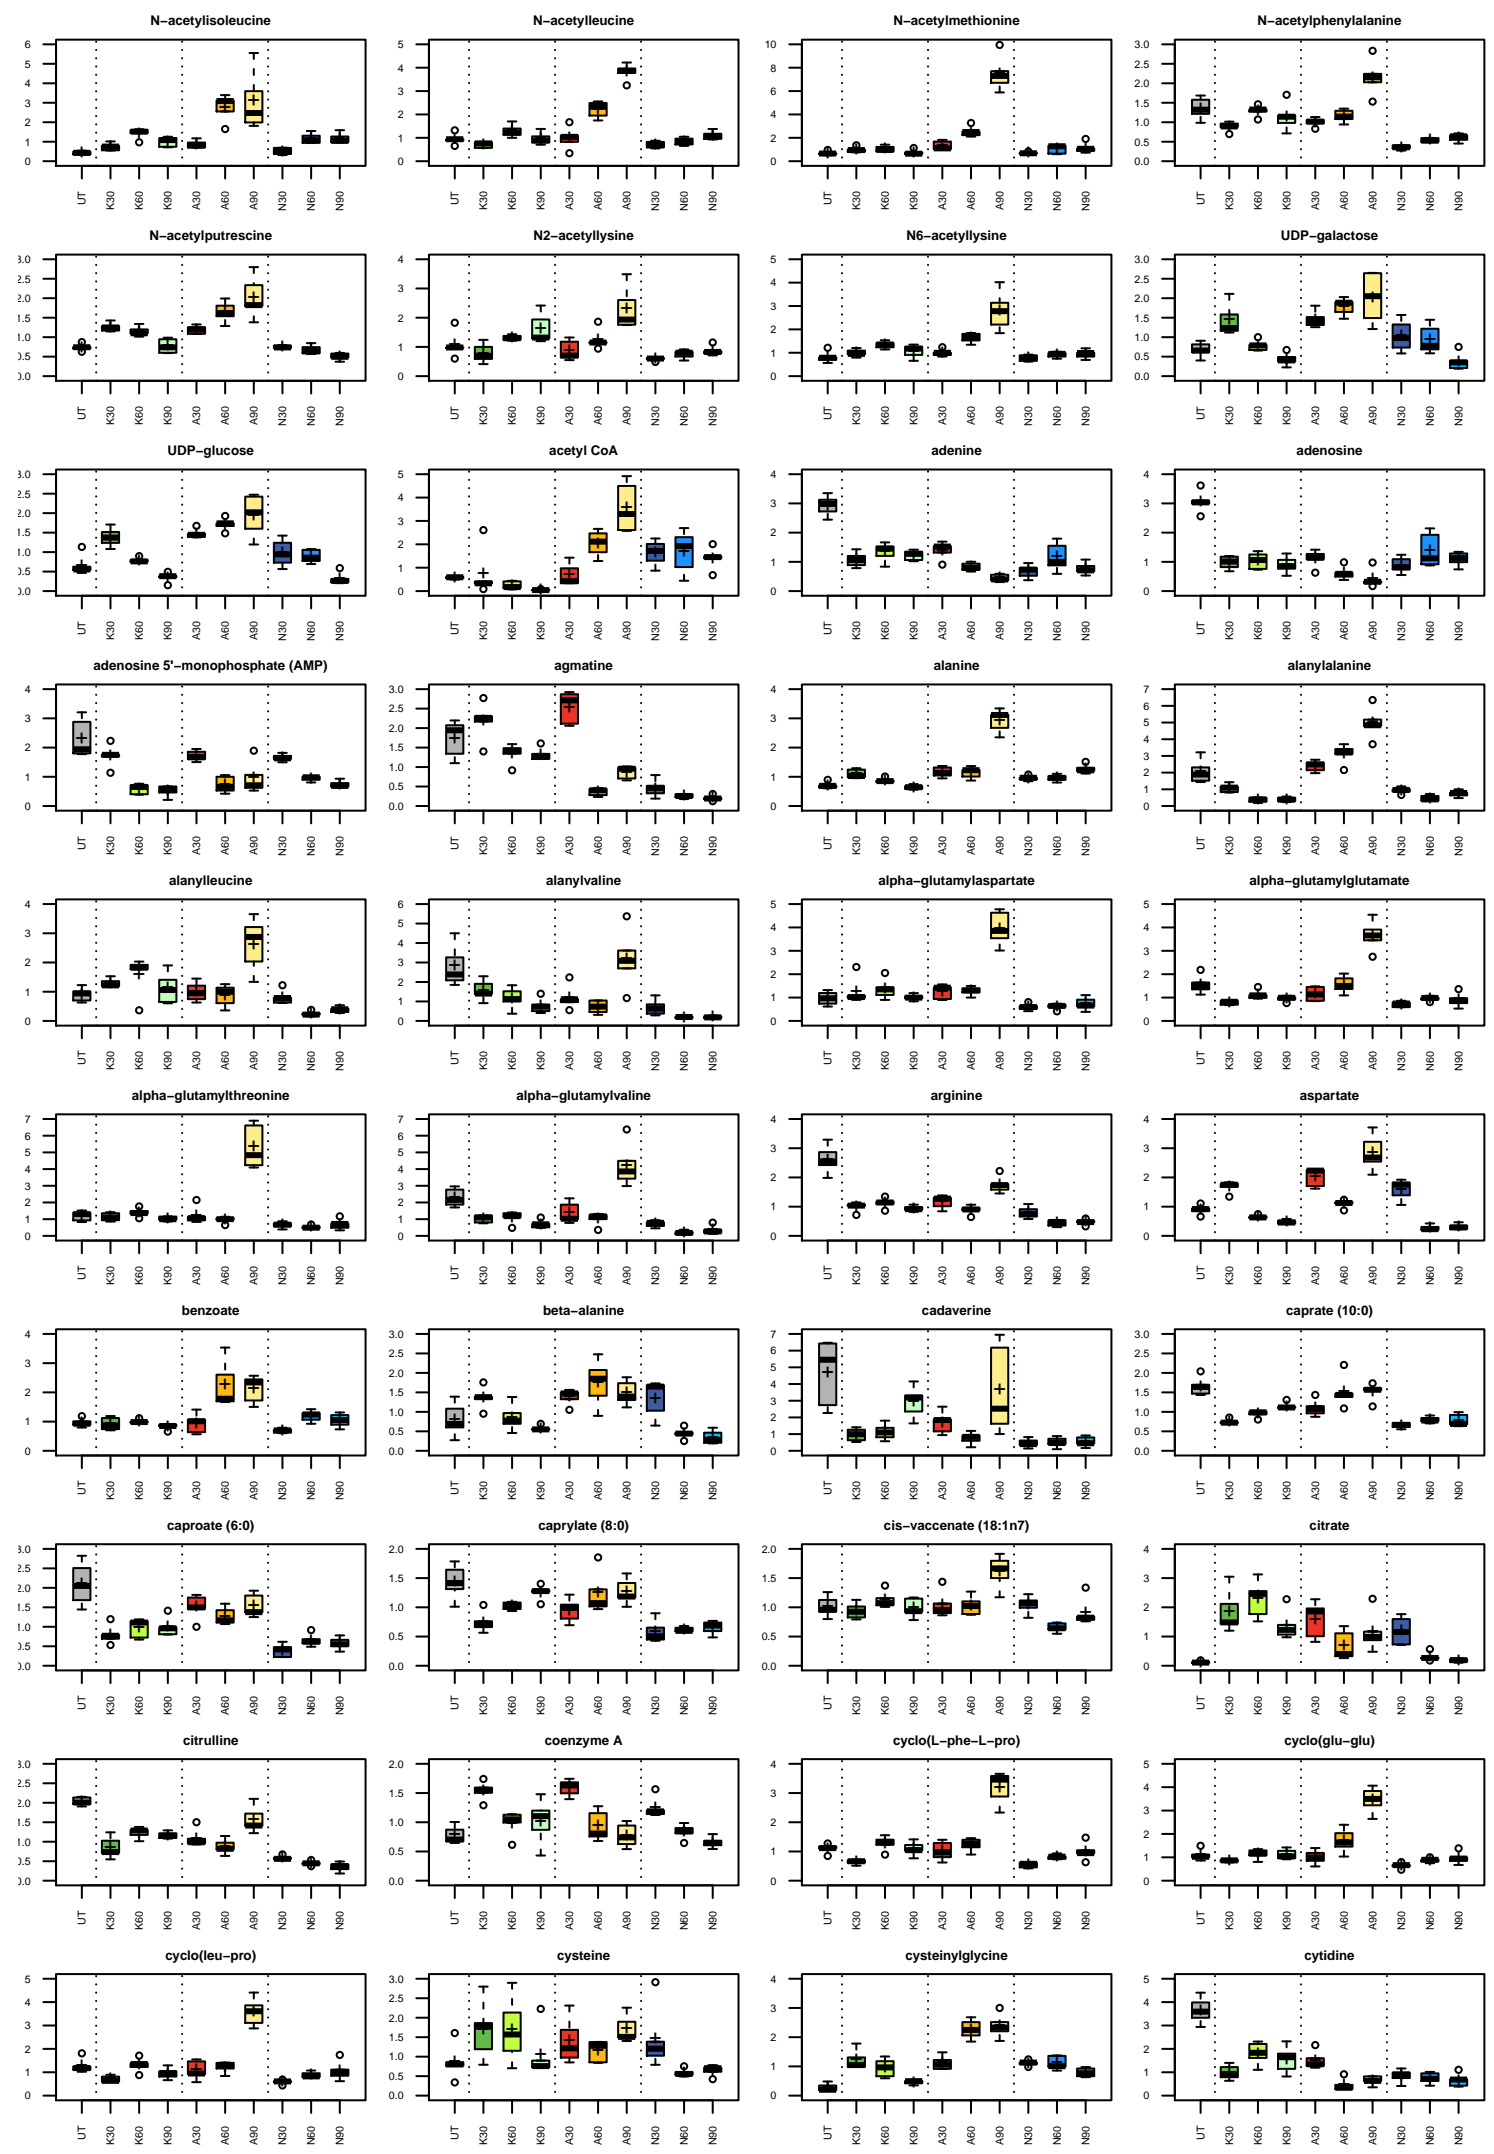

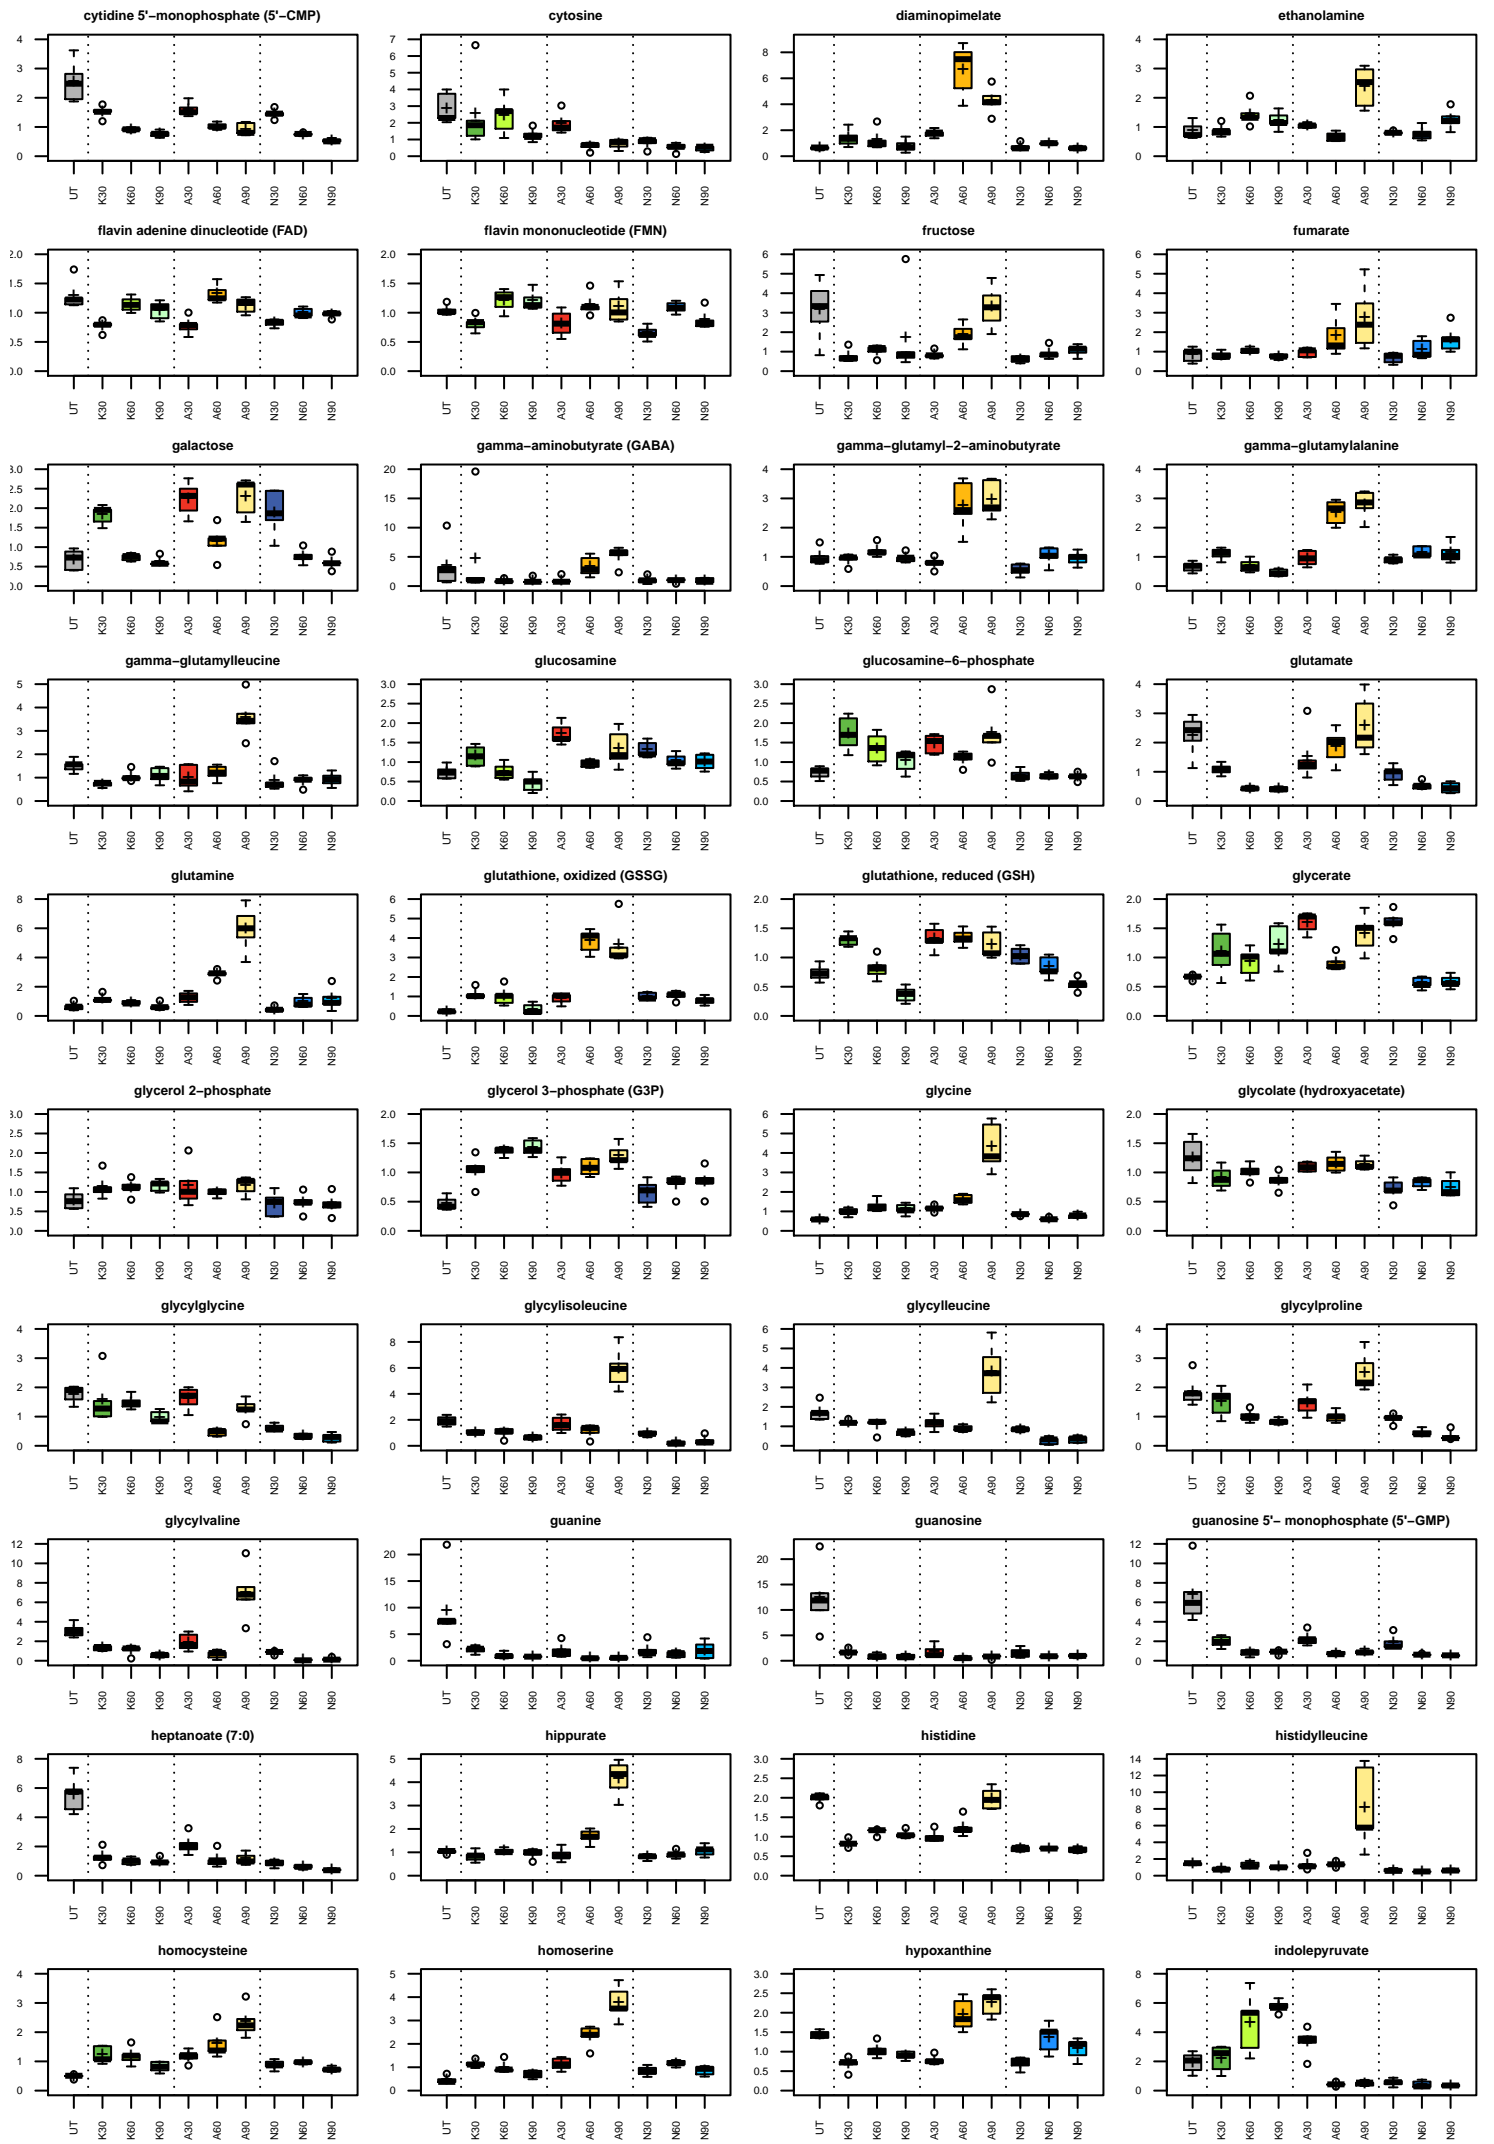

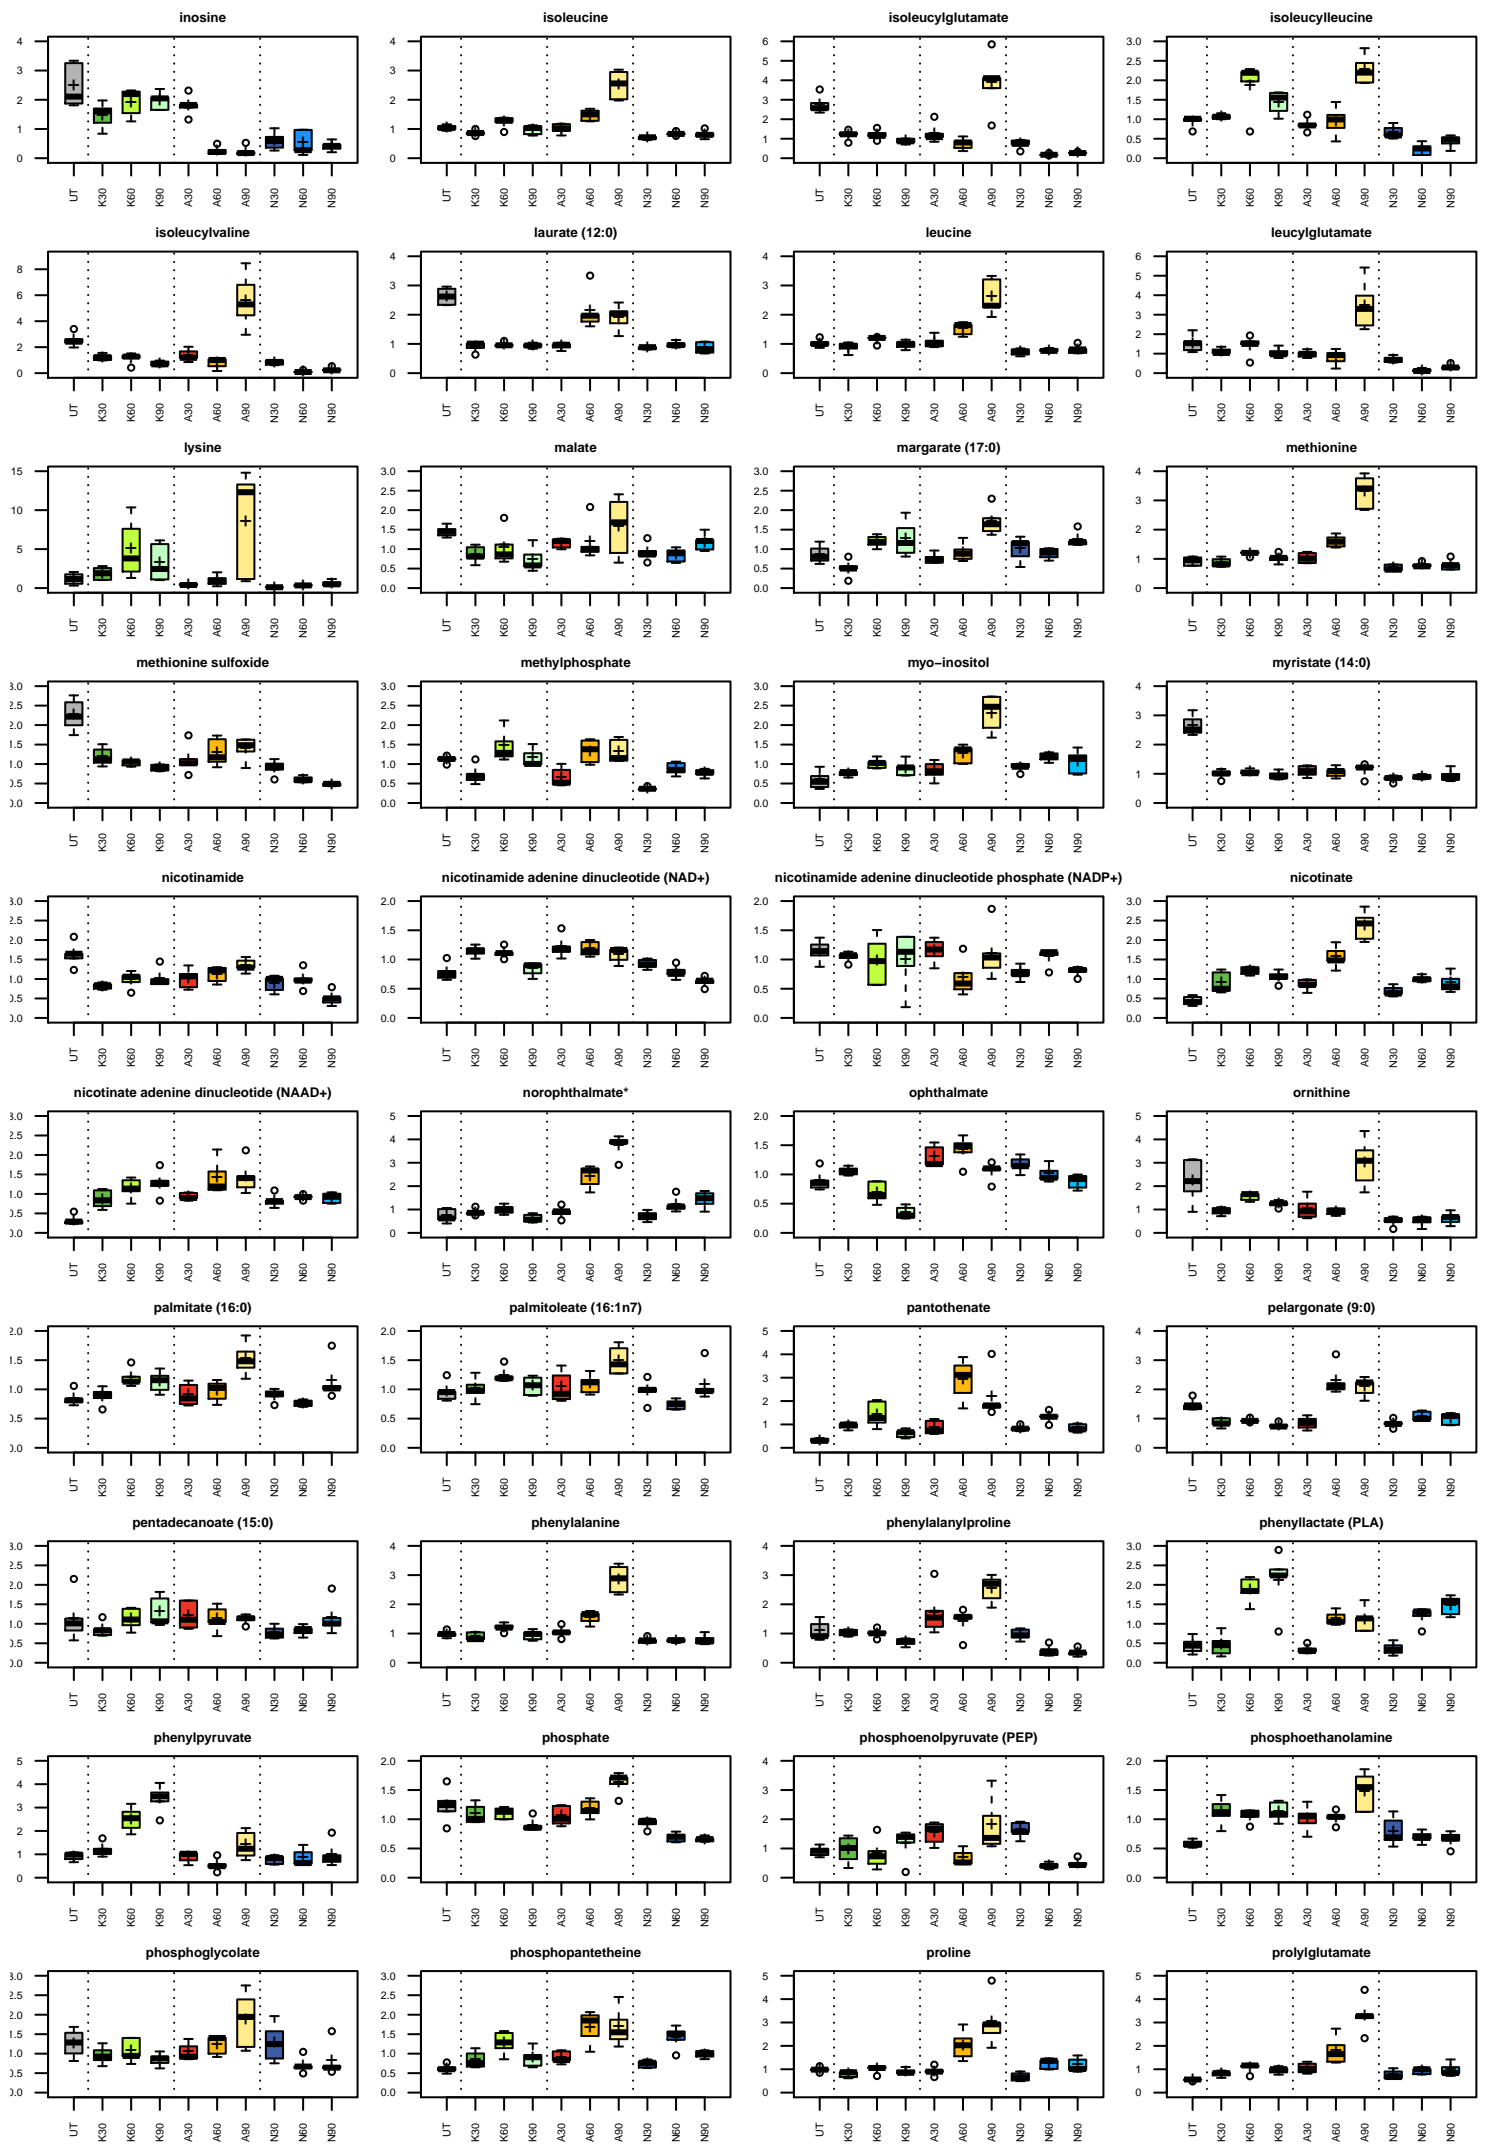

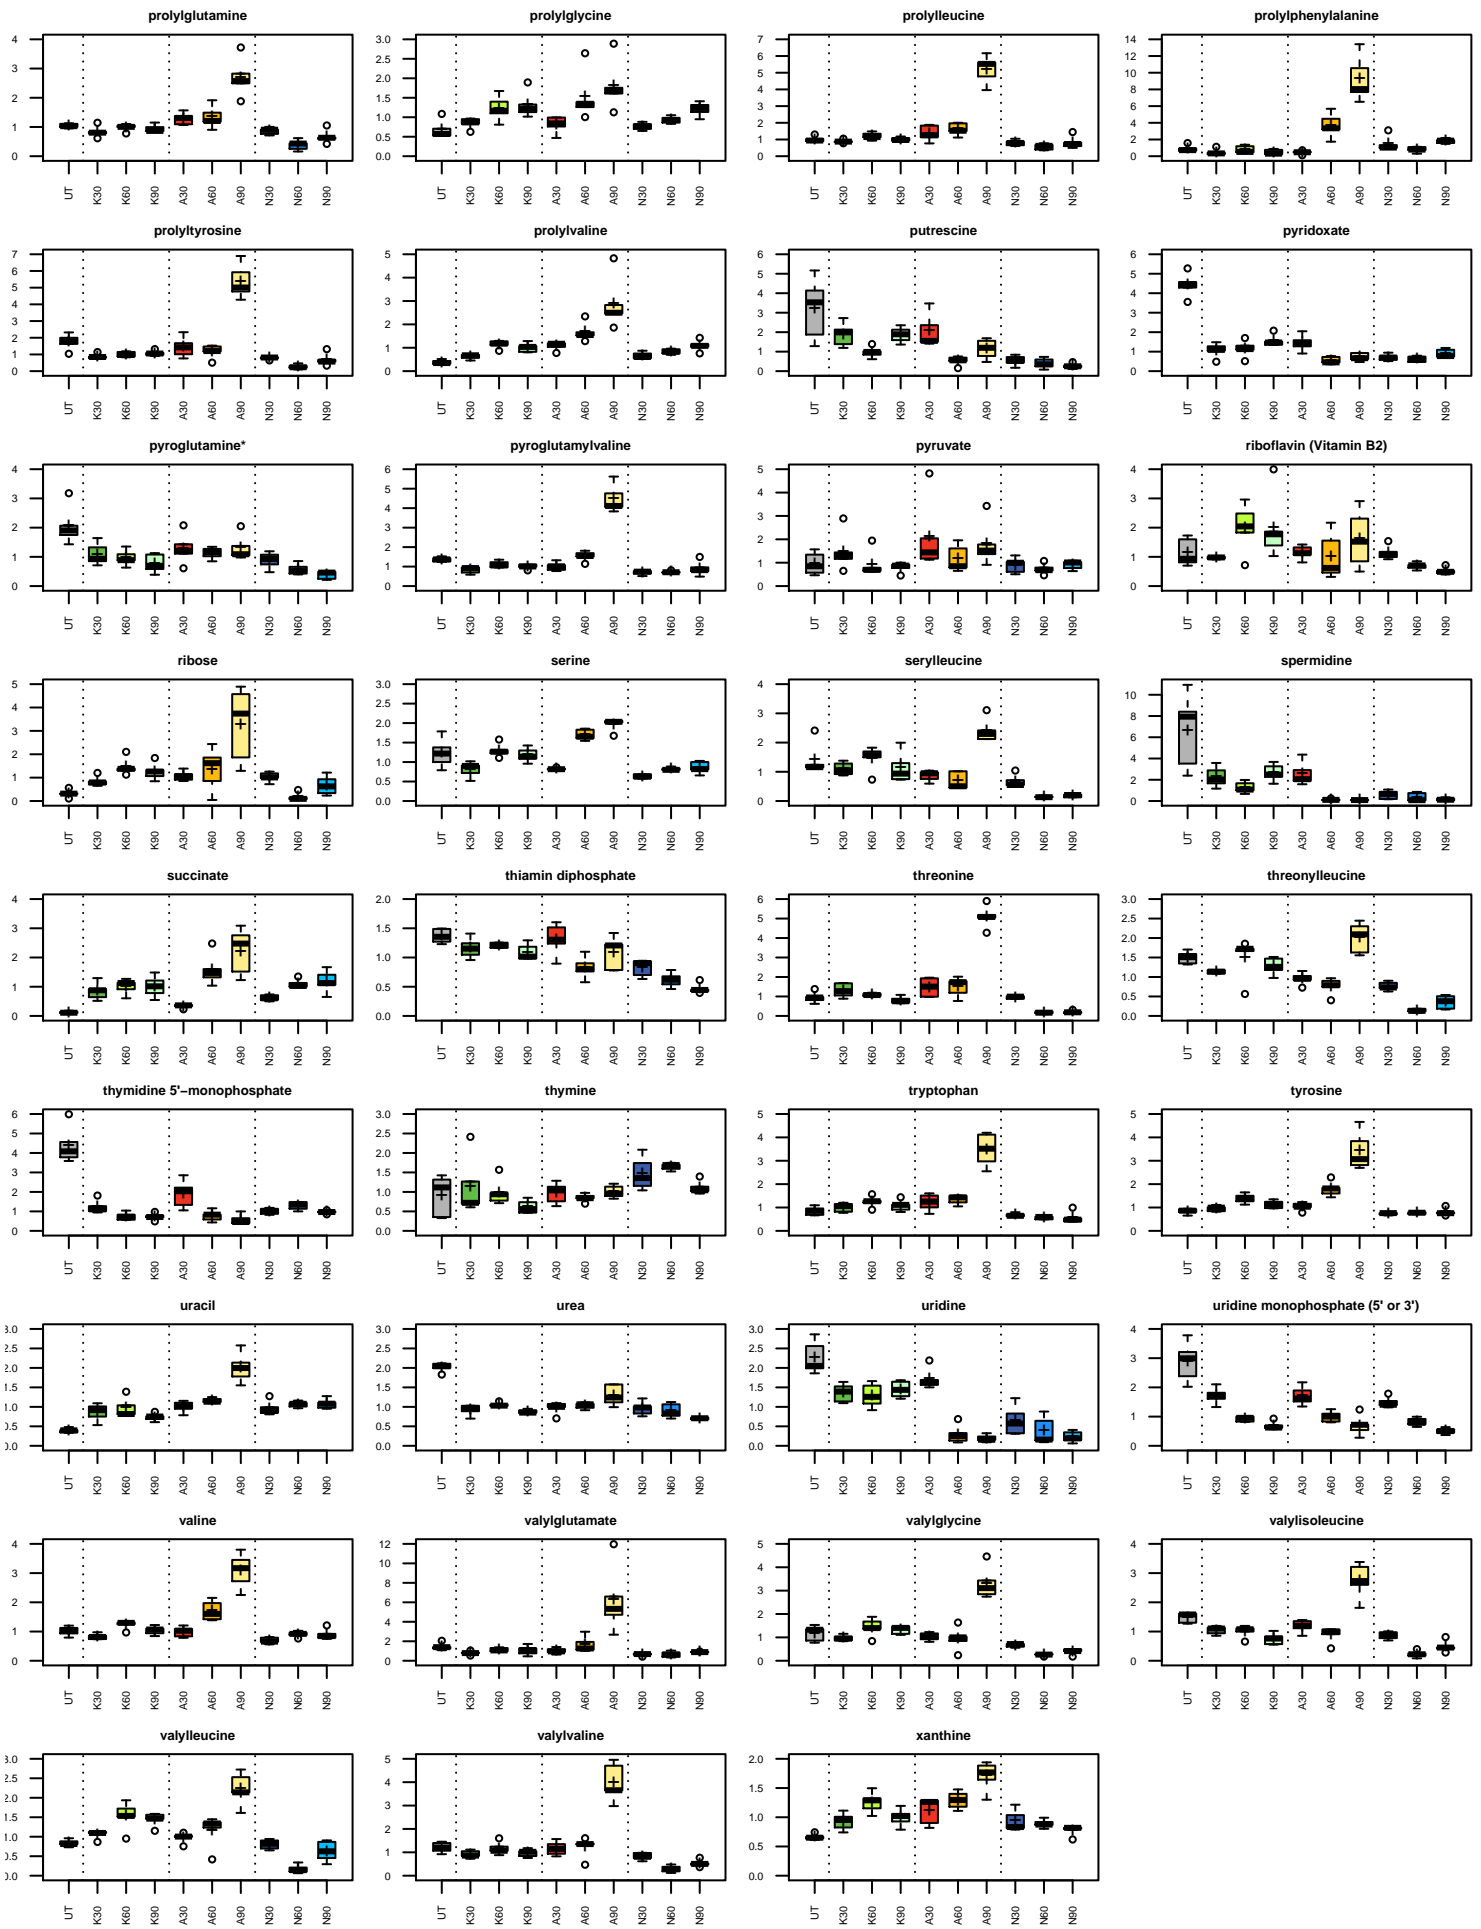

Supplement: NIHMS727428-supplement-2.pdf [file NIHMS727428-supplement-2.pdf]
